# Supplementary material for: Ba4Ni3F14·H2O: a ferrimagnetic compound with a staircase kagomé lattice
Source: Royal Society of Chemistry journal article supplement (doi:10.1039/d2cc06906g), 2023-01-01
Supplement: d2cc06906g1.pdf [file d2cc06906g1.pdf]

## Supporting Information

### **Ba<sub>4</sub>Ni<sub>3</sub>F<sub>14</sub>·H<sub>2</sub>O : A ferrimagnetic compound with a staircase kagomé lattice**

Yanqi Wang<sup>a,b</sup>, Zhiying Zhao<sup>a</sup>, Meiyan Cui<sup>a</sup>, Xiao-Ying Huang<sup>a</sup>, Zhangzhen He<sup>a,\*</sup>

<sup>a</sup> State Key Laboratory of Structure Chemistry, Fujian Institute of Research on the Structure of Matter, Chinese Academy of Sciences, Fuzhou 350002, China.

<sup>b</sup> University of Chinese Academy of Sciences, Beijing, 100049, China.

\*E-mail: hezz@fjirsm.ac.cn

**Fig. S1.** Views of the coordination geometry for (a) Ni1, (b)Ni2, (c) Ni3 atoms in Ba<sub>4</sub>Ni<sub>3</sub>F<sub>14</sub>·H<sub>2</sub>O.

**Fig. S2.** Simulated and experimental powder X-ray (Cu K $\alpha$ ) diffraction patterns for Ba<sub>4</sub>Ni<sub>3</sub>F<sub>14</sub>·H<sub>2</sub>O.

**Fig. S3.** The energy-dispersive spectrometry (EDS) elemental analyses of Ba<sub>4</sub>Ni<sub>3</sub>F<sub>14</sub>·H<sub>2</sub>O.

**Fig. S4.** FT-IR spectra of Ba<sub>4</sub>Ni<sub>3</sub>F<sub>14</sub>·H<sub>2</sub>O.

**Fig. S5** The hysteresis loop with the field range from -5 to +5 T at 2 K.

**Fig. S6** Temperature dependence of the specific heat at zero field, magnetic specific heat and magnetic entropy.

**Table S1** Crystal data and structure refinement for Ba<sub>4</sub>Ni<sub>3</sub>F<sub>14</sub>·H<sub>2</sub>O.

**Table S2.** Atomic coordinates and equivalent isotropic displacement parameters for Ba<sub>4</sub>Ni<sub>3</sub>F<sub>14</sub>·H<sub>2</sub>O.

**Table S3.** The bond lengths (Å) of Ba<sub>4</sub>Ni<sub>3</sub>F<sub>14</sub>·H<sub>2</sub>O.

**Table S4.** The bond angles (°) of Ba<sub>4</sub>Ni<sub>3</sub>F<sub>14</sub>·H<sub>2</sub>O.

**Table S5.** Anisotropic displacement parameters for Ba<sub>4</sub>Ni<sub>3</sub>F<sub>14</sub>·H<sub>2</sub>O.

## Experimental details:

### 1. Synthesis

In hydrothermal synthesis, HF has proven to be wonderful reaction media for the synthesis of crystalline metal fluoride.<sup>1, 2</sup>  $\text{Ba}_4\text{Ni}_3\text{F}_{14}\cdot\text{H}_2\text{O}$  was obtained via a fluoride-rich hydrofluorothermal synthesis method. A mixture of 2.0 mmol  $\text{NiF}_2$  (AR, 0.1934 g), 1.2 mmol  $\text{BaF}_2$  (AR, 0.2104 g), and 1 mmol  $\text{NaF}$  (AR, 0.0420 g) was put into 20 mL Teflon-lined steel autoclave with 2 mL of deionized water, while 1.0 mL of  $\text{NaOH}$  (2 M) solution, and 0.40 mL of HF (AR,  $\geq 40\%$ , HF is a highly corrosive liquid with smoke, be careful!) were added in turn. Autoclave was heated to  $180^\circ\text{C}$  within 3 hours and kept at four days, and then cooled to room temperature within 2 days. Finally, green hexagonal prism crystals were obtained by washing several times with deionized water, and the yield is about 18% (based on Ni). On the other hand, we propose the following reaction mechanism for the formation of  $\text{Ba}_4\text{Ni}_3\text{F}_{14}\cdot\text{H}_2\text{O}$ :

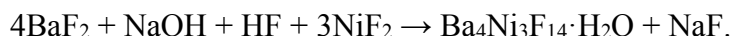

The addition of  $\text{NaF}$  may be considered to serve as a mineralizer to promote crystallization. For the crystallization of fluoride, HF not only effectively regulate PH, but also a beneficial solvent, which is conducive to the dissolution of reactants. Furthermore, excessive HF provides a fluorine-rich environment, which is more conducive to the crystallization of  $\text{Ba}_4\text{Ni}_3\text{F}_{14}\cdot\text{H}_2\text{O}$ . In addition, the temperature has a great effect on the growth of crystals. The crystals of  $\text{Ba}_4\text{Ni}_3\text{F}_{14}\cdot\text{H}_2\text{O}$  can be synthesized in a wide temperature area of  $170 - 230^\circ\text{C}$  with different quality, while the optimal growth condition is kept at  $180^\circ\text{C}$ , and then slow cooling for 2 days at least. The purity was checked by powder X-ray diffraction (XRD), which was collected on a Miniflex-600 diffractometer with  $\text{Cu } K\alpha$  radiation ( $\lambda = 1.54178 \text{ \AA}$ ) (Fig. S1).

### 2. Single Crystal X-ray diffraction

Single-crystal X-ray diffraction data of  $\text{Ba}_4\text{Ni}_3\text{F}_{14}\cdot\text{H}_2\text{O}$  was collected on a Rigaku Mercury CCD diffractometer using graphite-monochromated  $\text{Mo } K\alpha$  radiation ( $\lambda = 0.71073 \text{ \AA}$ ) at 298 K. The structure was solved by direct methods and refined by

full-matrix least-squares on  $F^2$  using the SHELX-2018 program package.<sup>3</sup> The optimized structural parameters were checked by the PLATON program.<sup>4</sup> The crystallographic data and structural refinement are shown in Table S1. The detailed atomic coordinates, displacement parameters, and anisotropic displacement parameters are presented in Table S2 and Table S5. The bond lengths and angles are illustrated in Tables S3-S4. Elemental analysis (Fig. S2) using energy dispersive spectrometry (EDS) confirmed only Ba, Ni, F and O elements in the system, where the average molar ratios of Ba: Ni were found to be  $\sim 1.38 : 1$ , agreeing with the results determined from single-crystal X-ray structural studies.

### 3. Magnetic Measurements.

Magnetic and specific heat measurements were measured on a commercial Quantum Design Physical Property Measurement System (PPMS). Powdered sample (16.80 mg) of  $\text{Ba}_4\text{Ni}_3\text{F}_{14}\cdot\text{H}_2\text{O}$  was placed in a gel capsule sample holder suspended in a plastic drinking straw. Magnetic susceptibility was measured from 2 to 300 K with an applied field of 0.1 T. Isothermal magnetization was tested at 2 K in applied field from 0 to 8 T (field scan of 0.1 T/step). Heat capacity was obtained from 2 to 100 K under zero field by a relaxation method using a sample in pellet ( $\sim 2.0 \times 2.0 \text{ mm}^2$ , 3.8 mg).

### 4. Infrared (IR) spectra.

Fourier transform infrared (FT-IR) spectroscopy was measured on the Bruker VERTEX70 spectrometer in the  $400 - 4000 \text{ cm}^{-1}$ . The IR ( Fig. S3) absorption peak around  $3419 \text{ cm}^{-1}$  can be assigned to the O-H stretching vibrations of water molecules, while the band around  $3091 \text{ cm}^{-1}$  may be from O-H $\cdots$ F hydrogen bonding. The peaks at  $1626\text{-}1383 \text{ cm}^{-1}$  may originate from the H-O-H bending vibrations.<sup>5, 6</sup> The splitting peaks around  $825\text{-}400 \text{ cm}^{-1}$  can be assigned to stretching vibrations of  $\nu(\text{Ni-F})$ .

### References:

1. N. Jiang, A. Ramanathan, R. E. Baumbach and H. S. La Pierre, *Chem. Sci.*, 2020, 11, 11811-11817.
2. M. Y. Cui, Z. Z. He, Y. Y. Tang and C. Q. Qiu, *J. Cryst. Growth*, 2017, **475**, 256-260.

3. J. Luebben, C. M. Wandtke, C. B. Huebschle, M. Ruf, G. M. Sheldrick and B. Dittrich, *Acta Crystallogr.*, 2019, 75, 50-62.
4. A. L. Spek, *J. Appl. Crystallogr.*, 2003, 36, 7-13.
5. W. Mikenda, F. Pertlik and S. Steinbock, *Monatsh. Chem.*, 1995, 126, 61-66.
6. E. C. Gonzalo, M. L. Sanjuan, M. Hoelzel, M. T. Azcondo, U. Amador, I. Sobrados, J. Sanz, F. Garcia-Alvarado and A. Kuhn, *Inorg. Chem.*, 2015, 54, 3172-3182.

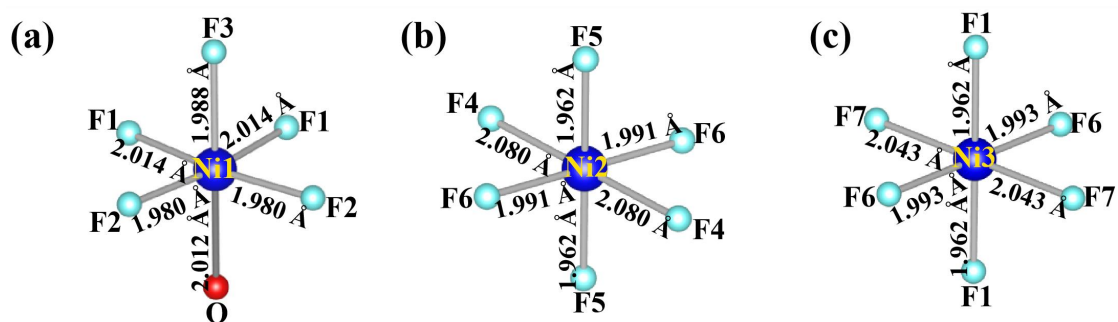

**Fig. S1.** Views of the coordination geometry for (a) Ni1, (b) Ni2, (c) Ni3 atoms in  $\text{Ba}_4\text{Ni}_3\text{F}_{14}\cdot\text{H}_2\text{O}$ .

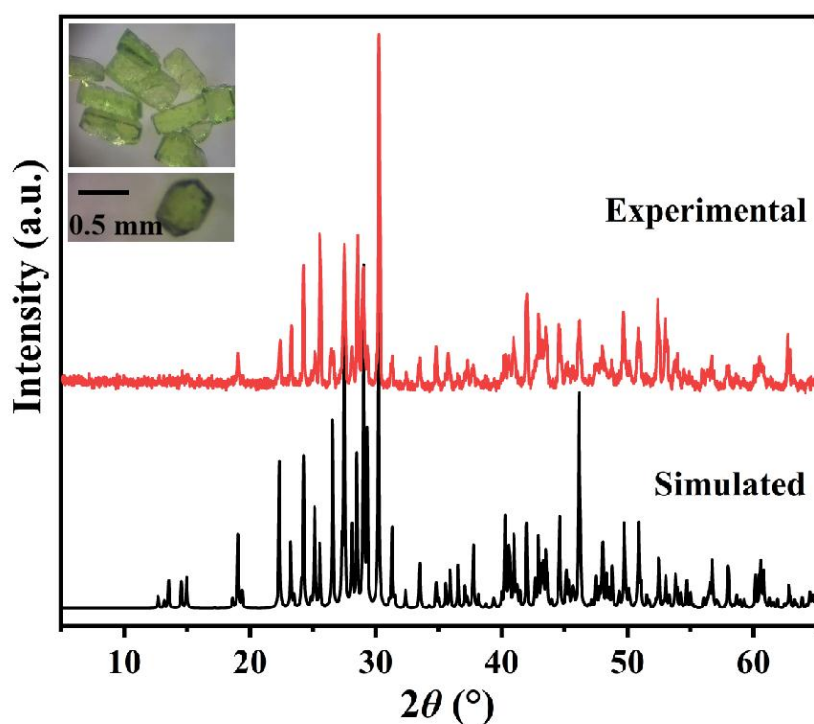

**Fig. S2.** Simulated and experimental powder X-ray ( $\text{Cu } K\alpha$ ) diffraction patterns for  $\text{Ba}_4\text{Ni}_3\text{F}_{14}\cdot\text{H}_2\text{O}$ . Inset: the single crystals of  $\text{Ba}_4\text{Ni}_3\text{F}_{14}\cdot\text{H}_2\text{O}$ .

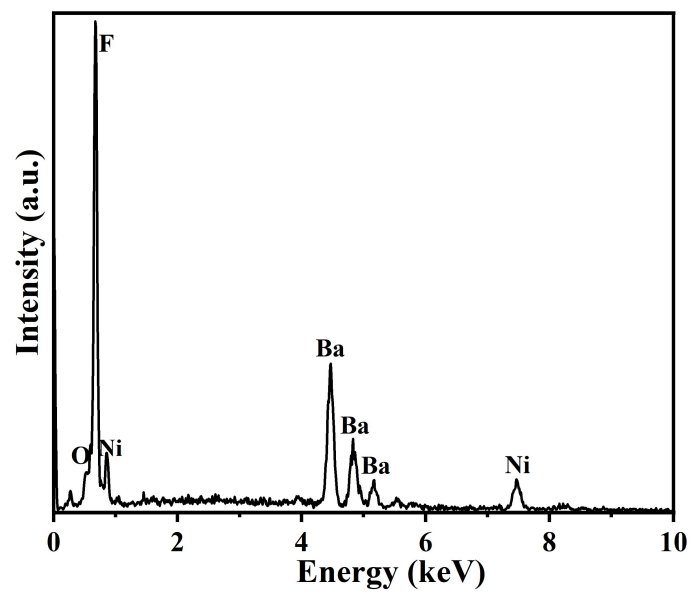

**Fig. S3.** The energy-dispersive spectrometry (EDS) elemental analyses of  $\text{Ba}_4\text{Ni}_3\text{F}_{14}\cdot\text{H}_2\text{O}$ .

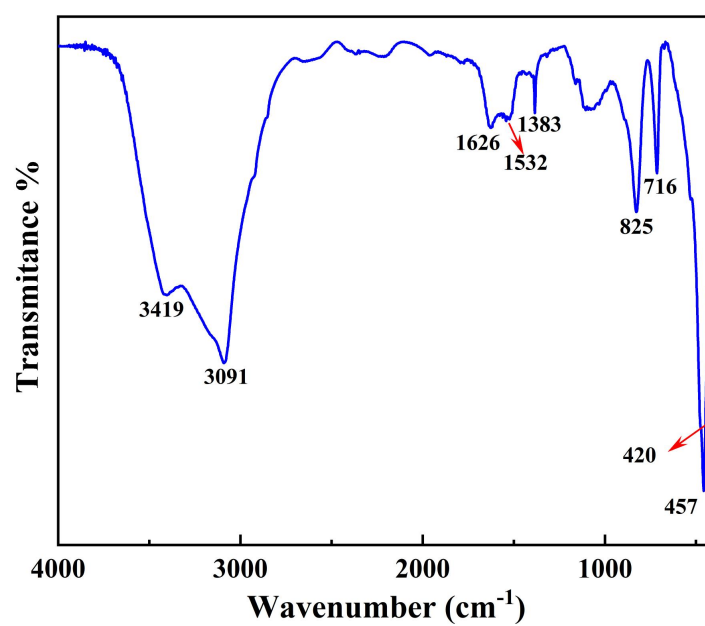

**Fig. S4.** FT-IR spectra of  $\text{Ba}_4\text{Ni}_3\text{F}_{14}\cdot\text{H}_2\text{O}$ .

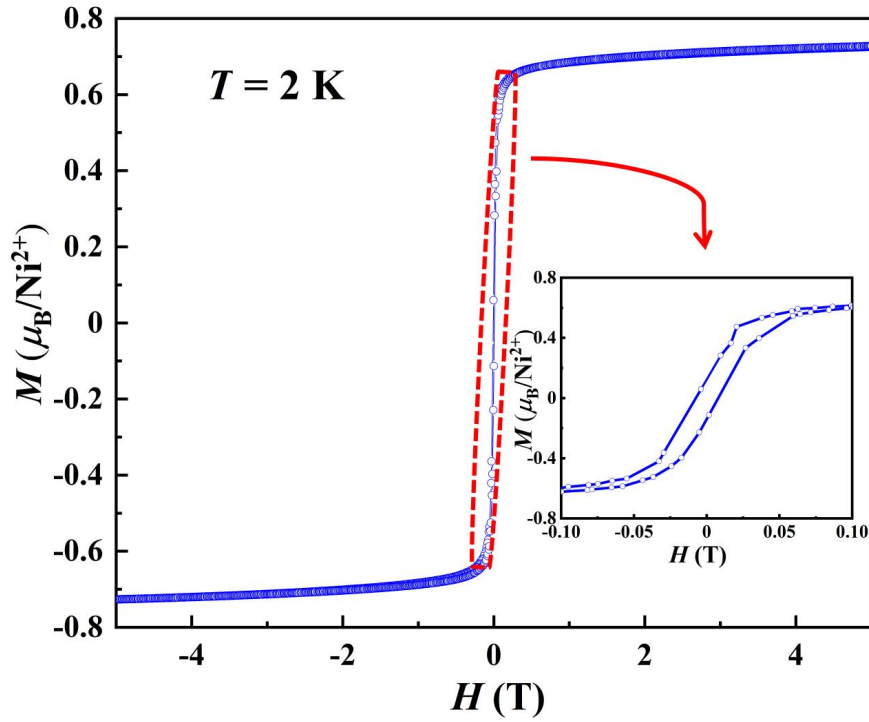

**Fig. S5** The hysteresis loop with the field range from  $-5$  to  $+5$  T at 2 K. The inset shows an enlarged view in the  $-0.10$  to  $0.10$  T.

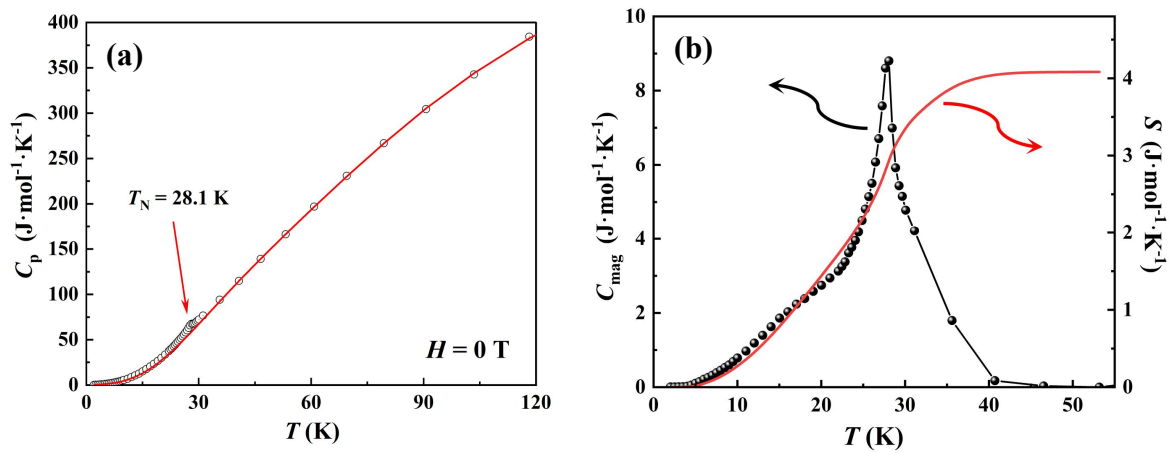

**Fig. S6** (a) Temperature dependence of the specific heat at zero field. The red line shows the lattice contribution. (b) Magnetic specific heat and corresponding magnetic entropy from 2 to 55 K.

**Table S1** Crystal data and structure refinement for Ba<sub>4</sub>Ni<sub>3</sub>F<sub>14</sub>·H<sub>2</sub>O.

| Compound                                                                                           | Ba <sub>4</sub> Ni <sub>3</sub> F <sub>14</sub> ·H <sub>2</sub> O |
|----------------------------------------------------------------------------------------------------|-------------------------------------------------------------------|
| CCDC                                                                                               | 2130595                                                           |
| Crystal system                                                                                     | Orthorhombic                                                      |
| Space group                                                                                        | <i>Pnma</i>                                                       |
| Fw                                                                                                 | 1009.51                                                           |
| <i>T</i> , K                                                                                       | 298(2) K                                                          |
| $\lambda$ , Å                                                                                      | 0.71073                                                           |
| <i>a</i> , Å                                                                                       | 13.9284(2)                                                        |
| <i>b</i> , Å                                                                                       | 12.5175(2)                                                        |
| <i>c</i> , Å                                                                                       | 7.65000(10)                                                       |
| $\alpha$ , deg                                                                                     | 90                                                                |
| $\beta$ , deg                                                                                      | 90                                                                |
| $\gamma$ , deg                                                                                     | 90                                                                |
| <i>V</i> , Å <sup>3</sup>                                                                          | 1333.77(3)                                                        |
| <i>Z</i>                                                                                           | 4                                                                 |
| <i>F</i> (000)                                                                                     | 1776                                                              |
| <i>D</i> <sub>calcd</sub> , g cm <sup>-3</sup>                                                     | 5.027                                                             |
| $\mu$ , cm <sup>-1</sup>                                                                           | 1.5914                                                            |
| GOF on F <sup>2</sup>                                                                              | 1.370                                                             |
| <i>R</i> <sub>1</sub> , w <i>R</i> <sub>2</sub> [ <i>I</i> > 2 $\sigma$ ( <i>I</i> )] <sup>a</sup> | 0.0248, 0.0589                                                    |
| <i>R</i> <sub>1</sub> , w <i>R</i> <sub>2</sub> (all data)                                         | 0.0257, 0.0593                                                    |

$$^a R_1 = \sum ||F_o| - |F_c|| / \sum |F_o|, wR_2 = \{ \sum w[(F_o)^2 - (F_c)^2]^2 / \sum w[(F_o)^2]^2 \}^{1/2}$$



**Table S2.** Atomic coordinates (  $\times 10^4$ ) and equivalent isotropic displacement parameters ( $\text{\AA}^2 \times 10^3$ ) for  $\text{Ba}_4\text{Ni}_3\text{F}_{14}\cdot\text{H}_2\text{O}$ .  $U(\text{eq})$  is defined as one third of the trace of the orthogonalized  $U_{ij}$  tensor.

| Atom  | x       | y       | z       | U(eq) |
|-------|---------|---------|---------|-------|
| Ba(1) | 2234(1) | 4370(1) | 2874(1) | 10(1) |
| Ba(2) | 3823(1) | 7500    | 3036(1) | 9(1)  |
| Ba(3) | 4851(1) | 2500    | 2098(1) | 10(1) |
| Ni(1) | 3546(1) | 2500    | 5938(1) | 8(1)  |
| Ni(2) | 5000    | 5000    | 0       | 8(1)  |
| Ni(3) | 5000    | 5000    | 5000    | 6(1)  |
| F(1)  | 4618(2) | 3501(2) | 5283(3) | 12(1) |
| F(2)  | 2628(2) | 1335(2) | 6461(3) | 15(1) |
| F(3)  | 3152(2) | 2500    | 3440(4) | 13(1) |
| F(4)  | 6291(2) | 5810(2) | -327(3) | 15(1) |
| F(5)  | 4274(2) | 6332(2) | 284(3)  | 13(1) |
| F(6)  | 5298(2) | 4702(2) | 2499(3) | 13(1) |
| F(7)  | 3621(2) | 5460(2) | 4486(3) | 13(1) |
| F(8)  | 6508(2) | 2500    | 3481(5) | 14(1) |
| O(1)  | 3983(4) | 2500    | 8444(5) | 18(1) |

**Table S3.** The bond lengths ( $\text{\AA}$ ) of  $\text{Ba}_4\text{Ni}_3\text{F}_{14}\cdot\text{H}_2\text{O}$

| Bond         | Dist.      | Bond          | Dist.    |
|--------------|------------|---------------|----------|
| Ni(1)-F(2)   | 1.980(2)   | Ba(1)-F(4)#2  | 2.915(3) |
| Ni(1)-F(2)#6 | 1.980(2)   | Ba(1)-F(5)#5  | 2.929(2) |
| Ni(1)-F(3)   | 1.988(3)   | Ba(1)-F(2)#6  | 2.934(3) |
| Ni(1)-O(1)   | 2.012(4)   | Ba(2)-F(5)#7  | 2.639(2) |
| Ni(1)-F(1)#6 | 2.014(2)   | Ba(2)-F(5)    | 2.639(2) |
| Ni(1)-F(1)   | 2.014(2)   | Ba(2)-F(8)#8  | 2.704(3) |
| Ni(2)-F(5)   | 1.962(2)   | Ba(2)-F(2)#1  | 2.769(2) |
| Ni(2)-F(5)#3 | 1.962(2)   | Ba(2)-F(2)#4  | 2.769(2) |
| Ni(2)-F(6)#3 | 1.991(2)   | Ba(2)-F(7)    | 2.798(2) |
| Ni(2)-F(6)   | 1.991(2)   | Ba(2)-F(7)#7  | 2.798(2) |
| Ni(2)-F(4)#3 | 2.080(2)   | Ba(2)-F(1)#9  | 2.817(2) |
| Ni(2)-F(4)   | 2.080(2)   | Ba(2)-F(1)#8  | 2.817(2) |
| Ni(3)-F(1)   | 1.962(2)   | Ba(2)-O(1)#8  | 3.258(5) |
| Ni(3)-F(1)#8 | 1.962(2)   | Ba(3)-F(8)    | 2.540(3) |
| Ni(3)-F(6)   | 1.993(2)   | Ba(3)-F(3)    | 2.579(3) |
| Ni(3)-F(6)#8 | 1.993(2)   | Ba(3)-F(5)#10 | 2.635(2) |
| Ni(3)-F(7)#8 | 2.043(2)   | Ba(3)-F(5)#3  | 2.635(2) |
| Ni(3)-F(7)   | 2.043(2)   | Ba(3)-F(1)#6  | 2.759(2) |
| Ba(1)-F(7)   | 2.668(2)   | Ba(3)-F(1)    | 2.759(2) |
| Ba(1)-F(2)#1 | 2.694(2)   | Ba(3)-F(6)    | 2.843(3) |
| Ba(1)-F(3)   | 2.7019(17) | Ba(3)-F(6)#6  | 2.843(3) |

|              |            |               |          |
|--------------|------------|---------------|----------|
| Ba(1)-F(6)#2 | 2.743(2)   | Ba(3)-F(4)#10 | 2.973(3) |
| Ba(1)-F(8)#2 | 2.7517(18) | Ba(3)-F(4)#3  | 2.973(3) |
| Ba(1)-F(4)#3 | 2.840(2)   | Ba(3)-O(1)#11 | 3.045(4) |
| Ba(1)-F(7)#4 | 2.860(2)   |               |          |

Symmetry transformations used to generate equivalent atoms:

|                            |                             |                        |
|----------------------------|-----------------------------|------------------------|
| #1 $-x+1/2, y+1/2, z-1/2$  | #2 $x-1/2, y, -z+1/2$       | #3 $-x+1, -y+1, -z$    |
| #4 $-x+1/2, -y+1, z-1/2$   | #5 $-x+1/2, -y+1, z+1/2$    | #6 $x, -y+1/2, z$      |
| #7 $x, -y+3/2, z$          | #8 $-x+1, -y+1, -z+1$       | #9 $-x+1, y+1/2, -z+1$ |
| #10 $-x+1, y-1/2, -z$      | #11 $x, y, z-1$             | #12 $x+1/2, y, -z+1/2$ |
| #13 $-x+1/2, y-1/2, z+1/2$ | #14 $x+1/2, -y+1/2, -z+1/2$ |                        |
| #15 $x, y, z+1$            |                             |                        |

**Table S4.** The bond angles (°) of Ba<sub>4</sub>Ni<sub>3</sub>F<sub>14</sub>·H<sub>2</sub>O

| Angle               | (°)        | Angle               | (°)       |
|---------------------|------------|---------------------|-----------|
| F(2)-Ni(1)-F(2)#6   | 94.92(15)  | F(8)#2-Ba(1)-F(4)#2 | 127.12(9) |
| F(2)-Ni(1)-F(3)     | 90.94(10)  | F(4)#3-Ba(1)-F(4)#2 | 144.72(2) |
| F(2)#6-Ni(1)-F(3)   | 90.94(10)  | F(7)#4-Ba(1)-F(4)#2 | 110.47(7) |
| F(2)-Ni(1)-O(1)     | 90.19(13)  | F(7)-Ba(1)-F(5)#5   | 112.45(7) |
| F(2)#6-Ni(1)-O(1)   | 90.19(13)  | F(2)#1-Ba(1)-F(5)#5 | 125.27(7) |
| F(3)-Ni(1)-O(1)     | 178.34(18) | F(3)-Ba(1)-F(5)#5   | 88.79(8)  |
| F(2)-Ni(1)-F(1)#6   | 94.04(10)  | F(6)#2-Ba(1)-F(5)#5 | 53.58(7)  |
| F(2)#6-Ni(1)-F(1)#6 | 171.00(10) | F(8)#2-Ba(1)-F(5)#5 | 73.68(9)  |
| F(3)-Ni(1)-F(1)#6   | 87.98(10)  | F(4)#3-Ba(1)-F(5)#5 | 157.90(7) |
| O(1)-Ni(1)-F(1)#6   | 90.71(14)  | F(7)#4-Ba(1)-F(5)#5 | 107.10(6) |
| F(2)-Ni(1)-F(1)     | 171.00(10) | F(4)#2-Ba(1)-F(5)#5 | 57.15(7)  |
| F(2)#6-Ni(1)-F(1)   | 94.04(10)  | F(7)-Ba(1)-F(2)#6   | 65.54(7)  |
| F(3)-Ni(1)-F(1)     | 87.98(10)  | F(2)#1-Ba(1)-F(2)#6 | 129.52(7) |
| O(1)-Ni(1)-F(1)     | 90.72(14)  | F(3)-Ba(1)-F(2)#6   | 60.08(9)  |
| F(1)#6-Ni(1)-F(1)   | 76.99(14)  | F(6)#2-Ba(1)-F(2)#6 | 109.09(7) |
| F(5)-Ni(2)-F(5)#3   | 180        | F(8)#2-Ba(1)-F(2)#6 | 99.53(8)  |
| F(5)-Ni(2)-F(6)#3   | 80.77(10)  | F(4)#3-Ba(1)-F(2)#6 | 118.84(7) |
| F(5)#3-Ni(2)-F(6)#3 | 99.23(10)  | F(7)#4-Ba(1)-F(2)#6 | 161.40(7) |
| F(5)-Ni(2)-F(6)     | 99.23(10)  | F(4)#2-Ba(1)-F(2)#6 | 70.62(7)  |
| F(5)#3-Ni(2)-F(6)   | 80.77(10)  | F(5)#5-Ba(1)-F(2)#6 | 57.02(6)  |
| F(6)#3-Ni(2)-F(6)   | 180        | F(5)#7-Ba(2)-F(5)   | 67.28(10) |
| F(5)-Ni(2)-F(4)#3   | 87.44(10)  | F(5)#7-Ba(2)-F(8)#8 | 145.77(5) |
| F(5)#3-Ni(2)-F(4)#3 | 92.56(10)  | F(5)-Ba(2)-F(8)#8   | 145.77(5) |
| F(6)#3-Ni(2)-F(4)#3 | 91.50(10)  | F(5)#7-Ba(2)-F(2)#1 | 96.79(7)  |
| F(6)-Ni(2)-F(4)#3   | 88.50(10)  | F(5)-Ba(2)-F(2)#1   | 62.27(7)  |

|                       |            |                     |            |
|-----------------------|------------|---------------------|------------|
| F(5)-Ni(2)-F(4)       | 92.56(10)  | F(8)#8-Ba(2)-F(2)#1 | 107.69(8)  |
| F(5)#3-Ni(2)-F(4)     | 87.44(10)  | F(5)#7-Ba(2)-F(2)#4 | 62.27(7)   |
| F(6)#3-Ni(2)-F(4)     | 88.50(10)  | F(5)-Ba(2)-F(2)#4   | 96.79(7)   |
| F(6)-Ni(2)-F(4)       | 91.50(10)  | F(8)#8-Ba(2)-F(2)#4 | 107.69(8)  |
| F(4)#3-Ni(2)-F(4)     | 180        | F(2)#1-Ba(2)-F(2)#4 | 63.57(10)  |
| F(1)-Ni(3)-F(1)#8     | 180        | F(5)#7-Ba(2)-F(7)   | 147.75(7)  |
| F(1)-Ni(3)-F(6)       | 89.06(10)  | F(5)-Ba(2)-F(7)     | 80.49(7)   |
| F(1)#8-Ni(3)-F(6)     | 90.94(10)  | F(8)#8-Ba(2)-F(7)   | 65.93(5)   |
| F(1)-Ni(3)-F(6)#8     | 90.94(10)  | F(2)#1-Ba(2)-F(7)   | 67.57(7)   |
| F(1)#8-Ni(3)-F(6)#8   | 89.06(10)  | F(2)#4-Ba(2)-F(7)   | 125.43(7)  |
| F(6)-Ni(3)-F(6)#8     | 180        | F(5)#7-Ba(2)-F(7)#7 | 80.49(7)   |
| F(1)-Ni(3)-F(7)#8     | 87.93(10)  | F(5)-Ba(2)-F(7)#7   | 147.75(7)  |
| F(1)#8-Ni(3)-F(7)#8   | 92.07(10)  | F(8)#8-Ba(2)-F(7)#7 | 65.93(5)   |
| F(6)-Ni(3)-F(7)#8     | 86.33(10)  | F(2)#1-Ba(2)-F(7)#7 | 125.43(7)  |
| F(6)#8-Ni(3)-F(7)#8   | 93.67(10)  | F(2)#4-Ba(2)-F(7)#7 | 67.57(7)   |
| F(1)-Ni(3)-F(7)       | 92.07(10)  | F(7)-Ba(2)-F(7)#7   | 131.71(10) |
| F(1)#8-Ni(3)-F(7)     | 87.93(10)  | F(5)#7-Ba(2)-F(1)#9 | 86.26(7)   |
| F(6)-Ni(3)-F(7)       | 93.67(10)  | F(5)-Ba(2)-F(1)#9   | 115.31(7)  |
| F(6)#8-Ni(3)-F(7)     | 86.33(10)  | F(8)#8-Ba(2)-F(1)#9 | 71.45(8)   |
| F(7)#8-Ni(3)-F(7)     | 180.00(4)  | F(2)#1-Ba(2)-F(1)#9 | 174.63(7)  |
| Ni(3)-F(1)-Ni(1)      | 145.47(13) | F(2)#4-Ba(2)-F(1)#9 | 121.80(7)  |
| Ni(3)-F(1)-Ba(3)      | 107.77(10) | F(7)-Ba(2)-F(1)#9   | 107.61(7)  |
| Ni(1)-F(1)-Ba(3)      | 91.40(8)   | F(7)#7-Ba(2)-F(1)#9 | 59.37(6)   |
| Ni(3)-F(1)-Ba(2)#8    | 105.47(9)  | F(5)#7-Ba(2)-F(1)#8 | 115.31(7)  |
| Ni(1)-F(1)-Ba(2)#8    | 100.42(9)  | F(5)-Ba(2)-F(1)#8   | 86.25(7)   |
| Ba(3)-F(1)-Ba(2)#8    | 96.34(7)   | F(8)#8-Ba(2)-F(1)#8 | 71.45(8)   |
| Ni(1)-F(2)-Ba(1)#13   | 135.06(11) | F(2)#1-Ba(2)-F(1)#8 | 121.80(7)  |
| Ni(1)-F(2)-Ba(2)#5    | 99.85(10)  | F(2)#4-Ba(2)-F(1)#8 | 174.63(7)  |
| Ba(1)#13-F(2)-Ba(2)#5 | 111.00(8)  | F(7)-Ba(2)-F(1)#8   | 59.37(6)   |
| Ni(1)-F(2)-Ba(1)#6    | 98.83(10)  | F(7)#7-Ba(2)-F(1)#8 | 107.61(7)  |
| Ba(1)#13-F(2)-Ba(1)#6 | 96.56(8)   | F(1)#9-Ba(2)-F(1)#8 | 52.83(9)   |
| Ba(2)#5-F(2)-Ba(1)#6  | 115.37(8)  | F(5)#7-Ba(2)-O(1)#8 | 59.99(8)   |
| Ni(1)-F(3)-Ba(3)      | 97.47(13)  | F(5)-Ba(2)-O(1)#8   | 59.99(8)   |
| Ni(1)-F(3)-Ba(1)#6    | 106.52(9)  | F(8)#8-Ba(2)-O(1)#8 | 120.18(10) |
| Ba(3)-F(3)-Ba(1)#6    | 111.75(8)  | F(2)#1-Ba(2)-O(1)#8 | 122.24(8)  |
| Ni(1)-F(3)-Ba(1)      | 106.52(9)  | F(2)#4-Ba(2)-O(1)#8 | 122.24(8)  |
| Ba(3)-F(3)-Ba(1)      | 111.75(8)  | F(7)-Ba(2)-O(1)#8   | 103.42(6)  |
| Ba(1)#6-F(3)-Ba(1)    | 120.02(12) | F(7)#7-Ba(2)-O(1)#8 | 103.42(6)  |
| Ni(2)-F(4)-Ba(1)#3    | 132.01(11) | F(1)#9-Ba(2)-O(1)#8 | 55.68(8)   |
| Ni(2)-F(4)-Ba(1)#12   | 90.59(9)   | F(1)#8-Ba(2)-O(1)#8 | 55.68(8)   |
| Ba(1)#3-F(4)-Ba(1)#12 | 93.84(7)   | F(8)-Ba(3)-F(3)     | 131.92(11) |
| Ni(2)-F(4)-Ba(3)#3    | 86.50(8)   | F(8)-Ba(3)-F(5)#10  | 82.38(8)   |
| Ba(1)#3-F(4)-Ba(3)#3  | 97.51(7)   | F(3)-Ba(3)-F(5)#10  | 134.41(7)  |
| Ba(1)#12-F(4)-Ba(3)#3 | 167.01(10) | F(8)-Ba(3)-F(5)#3   | 82.38(8)   |

|                        |            |                       |            |
|------------------------|------------|-----------------------|------------|
| Ni(2)-F(5)-Ba(3)#3     | 99.00(9)   | F(3)-Ba(3)-F(5)#3     | 134.41(7)  |
| Ni(2)-F(5)-Ba(2)       | 132.96(11) | F(5)#10-Ba(3)-F(5)#3  | 67.39(10)  |
| Ba(3)#3-F(5)-Ba(2)     | 110.76(9)  | F(8)-Ba(3)-F(1)#6     | 74.86(9)   |
| Ni(2)-F(5)-Ba(1)#4     | 92.59(9)   | F(3)-Ba(3)-F(1)#6     | 62.66(8)   |
| Ba(3)#3-F(5)-Ba(1)#4   | 93.61(7)   | F(5)#10-Ba(3)-F(1)#6  | 114.39(7)  |
| Ba(2)-F(5)-Ba(1)#4     | 119.86(9)  | F(5)#3-Ba(3)-F(1)#6   | 156.49(7)  |
| Ni(2)-F(6)-Ni(3)       | 147.46(14) | F(8)-Ba(3)-F(1)       | 74.86(9)   |
| Ni(2)-F(6)-Ba(1)#12    | 97.69(9)   | F(3)-Ba(3)-F(1)       | 62.66(8)   |
| Ni(3)-F(6)-Ba(1)#12    | 109.46(10) | F(5)#10-Ba(3)-F(1)    | 156.49(7)  |
| Ni(2)-F(6)-Ba(3)       | 91.84(9)   | F(5)#3-Ba(3)-F(1)     | 114.39(7)  |
| Ni(3)-F(6)-Ba(3)       | 103.83(10) | F(1)#6-Ba(3)-F(1)     | 54.04(9)   |
| Ba(1)#12-F(6)-Ba(3)    | 93.27(8)   | F(8)-Ba(3)-F(6)       | 75.86(5)   |
| Ni(3)-F(7)-Ba(1)       | 128.70(11) | F(3)-Ba(3)-F(6)       | 99.11(5)   |
| Ni(3)-F(7)-Ba(2)       | 103.84(9)  | F(5)#10-Ba(3)-F(6)    | 120.73(7)  |
| Ba(1)-F(7)-Ba(2)       | 110.90(8)  | F(5)#3-Ba(3)-F(6)     | 55.61(7)   |
| Ni(3)-F(7)-Ba(1)#5     | 103.77(9)  | F(1)#6-Ba(3)-F(6)     | 111.78(7)  |
| Ba(1)-F(7)-Ba(1)#5     | 98.93(7)   | F(1)-Ba(3)-F(6)       | 59.33(6)   |
| Ba(2)-F(7)-Ba(1)#5     | 109.47(8)  | F(8)-Ba(3)-F(6)#6     | 75.86(5)   |
| Ba(3)-F(8)-Ba(2)#8     | 104.78(12) | F(3)-Ba(3)-F(6)#6     | 99.11(5)   |
| Ba(3)-F(8)-Ba(1)#12    | 100.18(9)  | F(5)#10-Ba(3)-F(6)#6  | 55.61(7)   |
| Ba(2)#8-F(8)-Ba(1)#12  | 115.72(7)  | F(5)#3-Ba(3)-F(6)#6   | 120.73(7)  |
| Ba(3)-F(8)-Ba(1)#14    | 100.18(9)  | F(1)#6-Ba(3)-F(6)#6   | 59.34(6)   |
| Ba(2)#8-F(8)-Ba(1)#14  | 115.72(7)  | F(1)-Ba(3)-F(6)#6     | 111.78(7)  |
| Ba(1)#12-F(8)-Ba(1)#14 | 116.51(12) | F(6)-Ba(3)-F(6)#6     | 151.71(10) |
| Ni(1)-O(1)-Ba(3)#15    | 174.3(2)   | F(8)-Ba(3)-F(4)#10    | 132.56(5)  |
| Ni(1)-O(1)-Ba(2)#8     | 87.31(16)  | F(3)-Ba(3)-F(4)#10    | 71.97(7)   |
| Ba(3)#15-O(1)-Ba(2)#8  | 86.96(12)  | F(5)#10-Ba(3)-F(4)#10 | 62.48(7)   |
| F(7)-Ba(1)-F(2)#1      | 70.52(7)   | F(5)#3-Ba(3)-F(4)#10  | 109.10(7)  |
| F(7)-Ba(1)-F(3)        | 91.51(8)   | F(1)#6-Ba(3)-F(4)#10  | 90.94(7)   |
| F(2)#1-Ba(1)-F(3)      | 145.23(9)  | F(1)-Ba(3)-F(4)#10    | 131.50(7)  |
| F(7)-Ba(1)-F(6)#2      | 133.01(7)  | F(6)-Ba(3)-F(4)#10    | 148.90(7)  |
| F(2)#1-Ba(1)-F(6)#2    | 83.66(7)   | F(6)#6-Ba(3)-F(4)#10  | 58.45(7)   |
| F(3)-Ba(1)-F(6)#2      | 127.85(8)  | F(8)-Ba(3)-F(4)#3     | 132.56(5)  |
| F(7)-Ba(1)-F(8)#2      | 151.08(8)  | F(3)-Ba(3)-F(4)#3     | 71.97(7)   |
| F(2)#1-Ba(1)-F(8)#2    | 130.66(9)  | F(5)#10-Ba(3)-F(4)#3  | 109.10(7)  |
| F(3)-Ba(1)-F(8)#2      | 59.84(9)   | F(5)#3-Ba(3)-F(4)#3   | 62.48(7)   |
| F(6)#2-Ba(1)-F(8)#2    | 74.28(8)   | F(1)#6-Ba(3)-F(4)#3   | 131.50(7)  |
| F(7)-Ba(1)-F(4)#3      | 80.44(7)   | F(1)-Ba(3)-F(4)#3     | 90.93(7)   |
| F(2)#1-Ba(1)-F(4)#3    | 75.26(7)   | F(6)-Ba(3)-F(4)#3     | 58.45(7)   |
| F(3)-Ba(1)-F(4)#3      | 72.47(9)   | F(6)#6-Ba(3)-F(4)#3   | 148.90(7)  |
| F(6)#2-Ba(1)-F(4)#3    | 130.66(7)  | F(4)#10-Ba(3)-F(4)#3  | 90.69(9)   |
| F(8)#2-Ba(1)-F(4)#3    | 86.54(9)   | F(8)-Ba(3)-O(1)#11    | 138.00(13) |
| F(7)-Ba(1)-F(7)#4      | 133.02(6)  | F(3)-Ba(3)-O(1)#11    | 90.08(12)  |
| F(2)#1-Ba(1)-F(7)#4    | 66.30(7)   | F(5)#10-Ba(3)-O(1)#11 | 63.19(9)   |

|                     |           |                       |           |
|---------------------|-----------|-----------------------|-----------|
| F(3)-Ba(1)-F(7)#4   | 114.00(8) | F(5)#3-Ba(3)-O(1)#11  | 63.19(9)  |
| F(6)#2-Ba(1)-F(7)#4 | 59.01(6)  | F(1)#6-Ba(3)-O(1)#11  | 139.82(9) |
| F(8)#2-Ba(1)-F(7)#4 | 64.47(8)  | F(1)-Ba(3)-O(1)#11    | 139.81(9) |
| F(4)#3-Ba(1)-F(7)#4 | 71.66(7)  | F(6)-Ba(3)-O(1)#11    | 100.72(5) |
| F(7)-Ba(1)-F(4)#2   | 73.26(7)  | F(6)#6-Ba(3)-O(1)#11  | 100.72(5) |
| F(2)#1-Ba(1)-F(4)#2 | 74.06(7)  | F(4)#10-Ba(3)-O(1)#11 | 50.91(6)  |
| F(3)-Ba(1)-F(4)#2   | 130.24(9) | F(4)#3-Ba(3)-O(1)#11  | 50.91(6)  |
| F(6)#2-Ba(1)-F(4)#2 | 61.99(7)  |                       |           |

Symmetry transformations used to generate equivalent atoms:

|                            |                             |                        |
|----------------------------|-----------------------------|------------------------|
| #1 $-x+1/2, y+1/2, z-1/2$  | #2 $x-1/2, y, -z+1/2$       | #3 $-x+1, -y+1, -z$    |
| #4 $-x+1/2, -y+1, z-1/2$   | #5 $-x+1/2, -y+1, z+1/2$    | #6 $x, -y+1/2, z$      |
| #7 $x, -y+3/2, z$          | #8 $-x+1, -y+1, -z+1$       | #9 $-x+1, y+1/2, -z+1$ |
| #10 $-x+1, y-1/2, -z$      | #11 $x, y, z-1$             | #12 $x+1/2, y, -z+1/2$ |
| #13 $-x+1/2, y-1/2, z+1/2$ | #14 $x+1/2, -y+1/2, -z+1/2$ |                        |
| #15 $x, y, z+1$            |                             |                        |

**Table S5.** Anisotropic displacement parameters ( $\text{\AA}^2 \times 10^3$ ) for  $\text{Ba}_4\text{Ni}_3\text{F}_{14} \cdot \text{H}_2\text{O}$ .

The anisotropic displacement factor exponent takes the form:

$$-2\pi^2[h^2a^{*2}U_{11}+\dots+2hka^*b^*U_{12}]$$

| Atom  | U11   | U22   | U33   | U23   | U13   | U12   |
|-------|-------|-------|-------|-------|-------|-------|
| Ba(1) | 8(1)  | 11(1) | 10(1) | 0(1)  | -1(1) | 0(1)  |
| Ba(2) | 10(1) | 11(1) | 7(1)  | 0     | -1(1) | 0     |
| Ba(3) | 9(1)  | 13(1) | 8(1)  | 0     | 1(1)  | 0     |
| Ni(1) | 6(1)  | 9(1)  | 8(1)  | 0     | 0(1)  | 0     |
| Ni(2) | 7(1)  | 9(1)  | 6(1)  | 0(1)  | 0(1)  | 1(1)  |
| Ni(3) | 6(1)  | 8(1)  | 5(1)  | 0(1)  | 0(1)  | 0(1)  |
| F(1)  | 12(1) | 8(1)  | 17(1) | 0(1)  | 2(1)  | -2(1) |
| F(2)  | 11(1) | 13(1) | 21(1) | 4(1)  | 2(1)  | -3(1) |
| F(3)  | 11(1) | 16(2) | 12(1) | 0     | -4(1) | 0     |
| F(4)  | 11(1) | 17(1) | 17(1) | -1(1) | 2(1)  | -3(1) |
| F(5)  | 15(1) | 13(1) | 12(1) | -1(1) | 4(1)  | 3(1)  |
| F(6)  | 15(1) | 19(1) | 5(1)  | 0(1)  | 0(1)  | 2(1)  |
| F(7)  | 9(1)  | 16(1) | 13(1) | 1(1)  | -3(1) | -1(1) |
| F(8)  | 10(1) | 17(2) | 14(1) | 0     | 1(1)  | 0     |
| O(1)  | 31(2) | 14(2) | 9(2)  | 0     | -6(2) | 0     |
